# Supplementary material for: LaBeB3O7: a new phase-matchable nonlinear optical crystal exclusively containing the tetrahedral XO4 (X = B and Be) anionic groups
Source: Royal Society of Chemistry journal article supplement (doi:10.1039/c3tc30294f), 2013-01-01
Supplement: c3tc30294f.pdf [file c3tc30294f.pdf]

## Supplementary Information

### **LaBeB<sub>3</sub>O<sub>7</sub>: A New Phase-matchable Nonlinear Optical Crystal Exclusively Containing the Tetrahedral XO<sub>4</sub> (X = B and Be) Anionic Groups**

**Xue Yan,<sup>a,b,c</sup> Siyang Luo,<sup>\*a,b</sup> Zheshuai Lin,<sup>\*a,b</sup> Yinchao Yue,<sup>a,b</sup> Xiaoyang Wang,<sup>a,b</sup>  
Lijuan Liu<sup>a,b</sup> and Chuangtian Chen<sup>a,b</sup>**

<sup>a</sup> Beijing Center for Crystal Research and Development, Technical Institute of Physics and Chemistry,  
Chinese Academy of Sciences, Beijing 100190, P.R. China

<sup>b</sup>Key Laboratory of Functional Crystals and Laser Technology, Technical Institute of Physics and  
Chemistry, Chinese Academy of Sciences, Beijing 100190, China

<sup>c</sup>University of the Chinese Academy of Sciences, Beijing 100049, China

E-mail address: luosy@mail.ipc.ac.cn; zslin@mail.ipc.ac.cn.

## Table of Content

**Tab. S1.** Atomic coordinates and isotropic displacement coefficients.

**Tab. S2.** Bond distances (Å) and selected angles (deg.) for LaBeB<sub>3</sub>O<sub>7</sub>.

**Fig. S1.** As-grown LaBeB<sub>3</sub>O<sub>7</sub> crystals.

**Fig. S2.** XRD patterns of the LaBeB<sub>3</sub>O<sub>7</sub> samples before and after melting,  
respectively.

**Tab. S1.** Atomic coordinates and isotropic displacement coefficients.

| atom  | x         | y         | z          | Wyckoff | U(eq)(Å <sup>2</sup> ) | occupancy |
|-------|-----------|-----------|------------|---------|------------------------|-----------|
| La(1) | 0.5       | 0.2147(1) | 0.2516     | 2a      | 0.005(1)               | 1         |
| B(1)  | 0.3793(5) | 0.682(1)  | -0.215(2)  | 4b      | 0.004(1)               | 1         |
| B(2)  | 0.2502(4) | 0.183(1)  | -0.228(3)  | 4b      | 0.003(1)               | 0.5       |
| Be(1) | 0.2502(4) | 0.183(1)  | -0.228(3)  | 4b      | 0.003(1)               | 0.5       |
| O(1)  | 0.2744(4) | 0.8571(9) | -0.3671(9) | 4b      | 0.006(1)               | 1         |
| O(2)  | 0.3687(3) | 0.3629(9) | -0.288(1)  | 4b      | 0.004(1)               | 1         |
| O(3)  | 0.3713(5) | 0.7208(8) | 0.124(1)   | 4b      | 0.006(1)               | 1         |
| O(4)  | 0.5       | 0.805(1)  | -0.325(1)  | 2a      | 0.004(1)               | 1         |

**Tab. S2.** Selected Bond Distances (Å) and Angles (°) for LaBeB<sub>3</sub>O<sub>7</sub><sup>a</sup>

| LaBeB <sub>3</sub> O <sub>7</sub> |            |                                             |          |
|-----------------------------------|------------|---------------------------------------------|----------|
| Band distance (Å)                 |            |                                             |          |
| La(1)-O(4) <sup>#3</sup>          | 2.573(5)   | (B1)-O(1)                                   | 1.511(7) |
| La(1)-O(2) <sup>#1, #2</sup>      | 2.517(5)*2 | (B1)-O(2)                                   | 1.456(6) |
| La(1)-O(3) <sup>#4, #5</sup>      | 2.647(4)*2 | (B1)-O(3)                                   | 1.47(1)  |
| La(1)-O(3) <sup>#0, #6</sup>      | 2.692(4)*2 | (B1)-(O4)                                   | 1.477(6) |
| La(1)-O(2) <sup>#0, #6</sup>      | 2.784(4)*2 | (B(1)-O) <sub>average</sub>                 | 1.478    |
| La(1)-O(1) <sup>#7, #8</sup>      | 2.989(4)*2 | B(2)-O(1) <sup>#4</sup>                     | 1.587(7) |
| La(1)-O(4) <sup>#10</sup>         | 3.077(1)   | B(2)-O(1) <sup>#7</sup>                     | 1.59(1)  |
| La(1)-O(4) <sup>#2</sup>          | 3.191(8)   | B(2)-O(2)                                   | 1.518(6) |
| La(1)-O(1) <sup>#3, #11</sup>     | 3.317(5)*2 | B(2)-O(3) <sup>#7</sup>                     | 1.507(8) |
| La(1)-O(4)                        | 3.191(8)   | (B(2)-O) <sub>average</sub>                 | 1.55     |
| (La(1)-O) <sub>average</sub>      | 2.897      |                                             |          |
| Selected bond angle (°)           |            |                                             |          |
| O(1)-B(1)-O(2)                    | 110.7(4)   | O(1) <sup>#4</sup> -B(2)-O(1) <sup>#7</sup> | 107.0(4) |
| O(1)-B(1)-O(3)                    | 109.0(5)   | O(1) <sup>#4</sup> -B(2)-O(2)               | 106.4(4) |
| O(1)-B(1)-O(4)                    | 108.5(4)   | O(1) <sup>#4</sup> -B(2)-O(3) <sup>#9</sup> | 103.9(5) |
| O(2)-B(1)-O(3)                    | 108.6(4)   | O(1) <sup>#7</sup> -B(2)-O(2)               | 111.0(6) |
| O(2)-B(1)-O(4)                    | 111.1(4)   | O(1) <sup>#7</sup> -B(2)-O(3) <sup>#9</sup> | 107.7(5) |
| O(4)-B(1)-O(4)                    | 109.0(5)   | O(2)-B(2)-O(3) <sup>#9</sup>                | 119.8(5) |
| (O-B(1)-O) <sub>average</sub>     | 109.5      | (O-B(2)-O) <sub>average</sub>               | 109.3    |

<sup>a</sup>symmetry operations: (#0) x, y, z; (#1) 1-x, y, 1+z; (#2) x, y, 1+z; (#3) x, -1+y, 1+z; (#4) x, -1+y, z; (#5) 1-x, -1+y, z; (#6) 1-x, y, z; (#7) 0.5-x, 1-y, 0.5+z; (#8) 0.5+x, 1-y, 0.5+z; (#9) 0.5-x, 1-y, -0.5+z.; (#10) x, -1+y, z; (#11) 1-x, -1+y, 1+z.

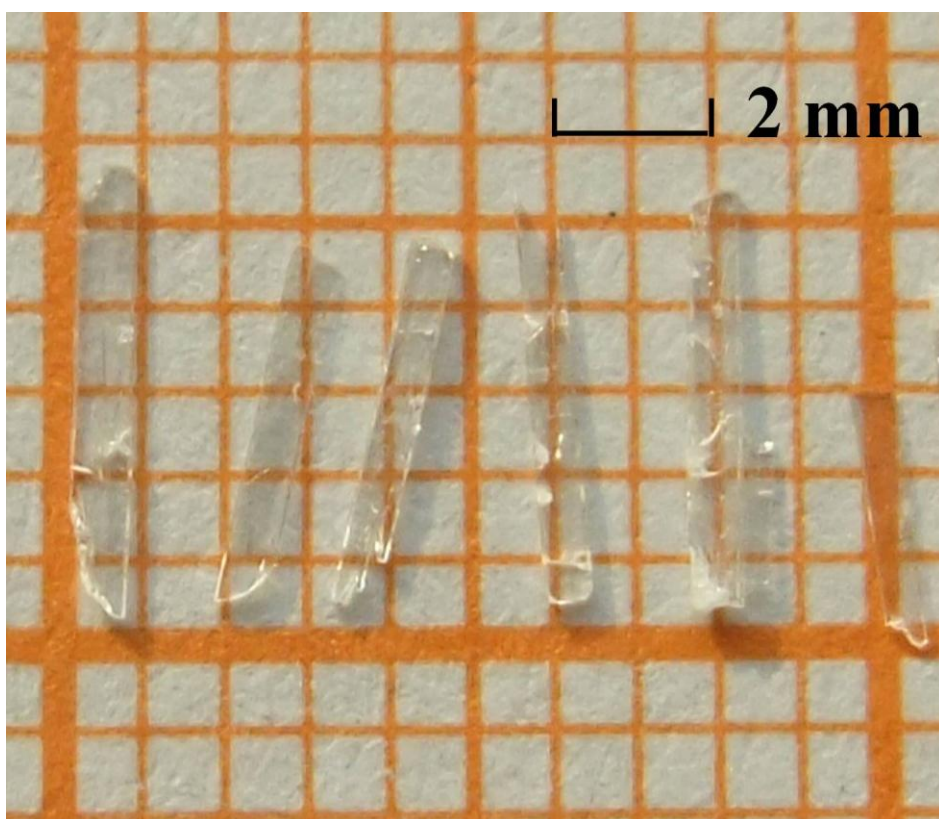

**Fig. S1.** As-grown LaBeB<sub>3</sub>O<sub>7</sub> crystals.

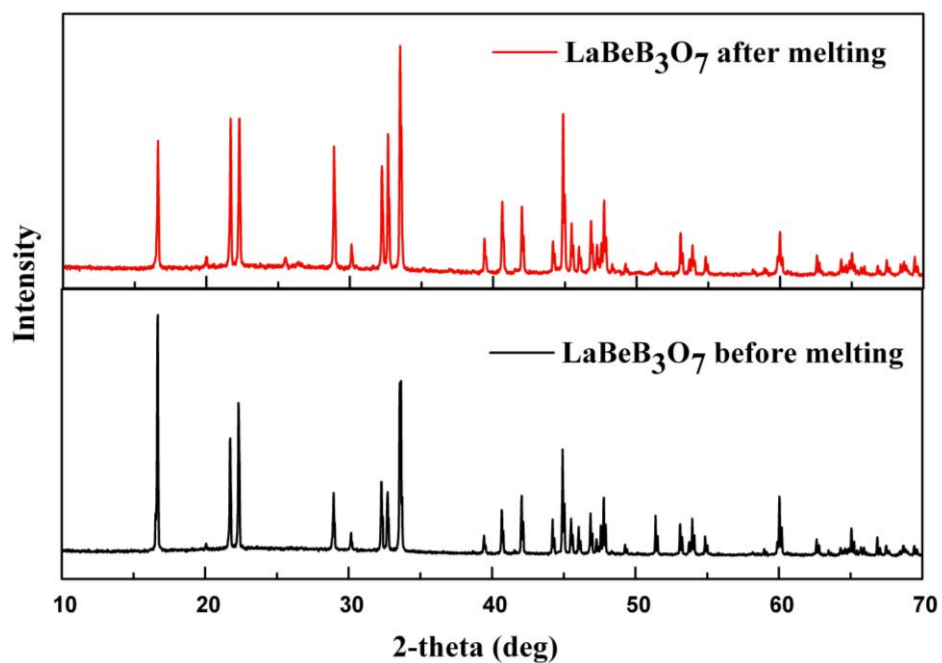

**Fig. S2.** XRD patterns of the  $\text{LaBeB}_3\text{O}_7$  samples before and after melting, respectively. The black curve is the pattern of  $\text{LaBeB}_3\text{O}_7$  before melting and the red one is the pattern of samples after melting.
